# **M1 disruption delays motor processes but not deliberation about action choices**

Gerard Derosiere<sup>1</sup>, David Thura<sup>2</sup>, Paul Cisek<sup>3</sup>, Julie Duque<sup>1</sup>

<sup>1</sup> *Institute of Neuroscience, Laboratory of Neurophysiology, Université catholique de Louvain, Brussels, Belgium*

<sup>2</sup> *Lyon Neuroscience Research Center - Impact team, Inserm U1028 - CNRS UMR 5292, Bron, France*

<sup>3</sup> *Department of Neuroscience, Université de Montréal, Montréal, QC H3T 1J4, Canada*

Corresponding author contact details:

**Gerard Derosiere**

CoActions Lab

Institute of Neuroscience

Université catholique Louvain

Av. Mounier, 53 - Bte B1.53.04

1200 Bruxelles, Belgium

Tel: + 32 (0)2 764 54 20

Email address: [gerard.derosiere@uclouvain.be](mailto:gerard.derosiere@uclouvain.be)

Running title: “M1 disruption and motor decisions”

## Abstract

Decisions about actions typically involve a period of deliberation that ends with the commitment to a choice and the motor processes overtly expressing that choice. Previous studies have shown that neural activity in sensorimotor areas, including the primary motor cortex (M1), correlates with deliberation features during action selection. Yet, the causal contribution of these areas to the decision process remains unclear. Here, we investigated whether M1 determines choice commitment, or whether it simply reflects decision signals coming from upstream structures and instead mainly contributes to the motor processes that follow commitment. To do so, we tested the impact of a disruption of M1 activity, induced by continuous theta burst stimulation (cTBS), on the behavior of human subjects in (1) a simple reaction time (SRT) task allowing us to estimate the duration of the motor processes and (2) a modified version of the tokens task (Cisek et al., 2009), which allowed us to estimate subjects' time of commitment as well as accuracy criterion. The efficiency of cTBS was attested by a reduction in motor evoked potential amplitudes following M1 disruption, as compared to those following a sham stimulation. Furthermore, M1 cTBS lengthened SRTs, indicating that motor processes were perturbed by the intervention. Importantly, all of the behavioral results in the tokens task were similar following M1 disruption and sham stimulation, suggesting that the contribution of M1 to the deliberation process is negligible. Taken together, these findings indicate that M1 contribution is downstream of the decision process.

## New and noteworthy

Decisions between actions are ubiquitous in the animal realm. Deliberation during action choices entails changes in the activity of the sensorimotor areas controlling those actions, but the causal role of these areas is still often debated. Using continuous theta burst stimulation, we show that disrupting the primary motor cortex (M1) delays the motor processes that follow instructed commitment but does not alter volitional deliberation, suggesting that M1 contribution is downstream of the decision process.

## Key-words

Motor cortex, TMS, urgency, action selection, movement preparation

## INTRODUCTION

The physical world provides animals with a variety of action opportunities, constantly requiring them to make decisions, some of which are critical for survival. For instance, the choice of a car driver to turn left or right in front of a sudden obstacle may have dramatic consequences on her/his life and on that of the pedestrians around. The driver will have to quickly deliberate and commit to one action.

Deliberation about actions is thought to entail a competition between distinct neural populations within the motor system (Pezzulo and Cisek, 2016; Svoboda and Li, 2018). In this view, separate action opportunities increase activity of distinct populations, which compete against each other, possibly through mutual inhibition (Michelet et al., 2010). An action is eventually selected and executed when activity in the related population reaches a critical decision threshold (Laming, 1968; Ratcliff, 1978; Stone, 1960).

In line with this hypothesis, a compendium of studies has shown that the dorsal premotor (PMd), but also the primary motor cortex (M1), display a buildup of choice-selective activity during the decision process {Formatting Citation}. The rate of this buildup depends on the amount of sensory evidence favoring the selection of each action in the environment (Alamia et al., 2018; Derosiere et al., 2018; Donner et al., 2009; Gould et al., 2012; Tosoni et al., 2008, 2014; Wyart et al., 2012). According to this view, in the car driver example above, the presence of pedestrians on the right side of the street would increase the activity of the population coding for the movement of rotating the wheel towards the left, and possibly weaken the activity of the population favoring the opposite rightward rotation movement. Ultimately, the driver will commit to turning left and execute the related action, to avoid hitting the group of people.

Importantly, making decisions often requires balancing the desire to take time to deliberate accurately (*i.e.*, to accumulate sensory evidence and make the best choice) with the urge to act (Churchland et al., 2008; Forstmann et al., 2008; Hanks et al., 2011; Thura and Cisek, 2014a). During a speeded decision, the urge to act increases as time passes (Cisek et al., 2009, Ditterich, 2006, Drugowitsch et al., 2012, Seideman et al., 2018; Thura et al., 2012) but the overall level of urgency also varies depending on the context (Murphy et al., 2016, Thura et al., 2014; Thura and Cisek, 2016, 2017). In the situation described earlier, the driver's level of urgency will be higher if the obstacle suddenly appears close to the car than if it appears far away. As evident in this example, adjustments in urgency alter the balance between decision speed and accuracy – *i.e.*, the so-called speed-accuracy tradeoff: choices are more likely to be incorrect when time pressure is elevated, while accuracy improves when temporal demands permit long deliberation (*e.g.*, Hanks et al., 2011; Seideman et al., 2018).

At the neural level, several lines of evidence indicate that higher levels of urgency during deliberation about action choices modulate neural activity in PMd and M1 (Murphy et al., 2016; Steinemann et al., 2018, Thura and Cisek, 2014a, 2016). In these areas, activity is globally amplified at baseline and then builds-up at a faster rate when urgency is high compared to when it is low, reducing the time needed to reach decision threshold but at the cost of accuracy (Thura and Cisek, 2016). Recent findings suggest that the basal ganglia (Thura and Cisek, 2017; van Maanen et al., 2016) and the locus coeruleus (Hauser et al., 2018; Murphy et al., 2016) may contribute to generate such a modulation of motor cortical activity.

Together, these data indicate that the motor cortical areas combine both the sensory evidence signals guiding the choice with the urgency-related signals determining the best time to commit to that choice, suggesting a crucial role of these areas in the decision-making process. To date, however, a causal test of this role is lacking.

Here, we investigated whether M1 causally contributes to deliberation about action choices, or whether it simply reflects decision signals coming from upstream areas, such as PMd, the basal ganglia, or the locus coeruleus. It has previously been shown that disrupting M1 activity by means of continuous theta burst stimulation (cTBS) causes finger responses to slow down (Huang et al., 2005; Lakhani et al., 2014; McAllister et al., 2013). However, it is a matter of debate whether this effect should be interpreted as a slowing down of processes involved in deciding which action to perform (*i.e.*, in the deliberation process) or as a slowing down of the motor processes that follow commitment (*i.e.*, of movement initiation and execution). If M1 is causally involved in the decision process, then M1 disruption should lengthen deliberation in a manner consistent with reduced urgency, and therefore should increase the accuracy of subjects' choices as compared to a sham cTBS session. Conversely, if M1 is mainly involved in initiating and executing movements, then its disruption should have no effect on the deliberation portion of response time or the accuracy of choices, and should only slow down the motor processes that follow commitment to an action. These hypotheses were tested by characterizing action choices in a modified version of the tokens task (Cisek et al., 2009), which is specifically designed to estimate subjects' time of commitment, their accuracy criterion and infer from those variables their urgency functions (Thura et al., 2014).

## MATERIALS AND METHODS

### Participants

19 healthy right-handed subjects participated in this study (10 women;  $24 \pm 3.5$  years old). Participants were financially compensated for their participation and earned additional money depending on their performance in a decision-making task (see *Task* section below). The protocol was approved by the institutional review board of the catholic University of Louvain (UCLouvain), Brussels, Belgium, and required written informed consent, in compliance with the principles of the Declaration of Helsinki.

### Experimental design

Experiments were conducted in a quiet and dimly-lit room. Subjects were seated at a table in front of a 21-inch cathode ray tube computer screen. The display was gamma-corrected and its refresh rate was set at 100 Hz. The computer screen was positioned at a distance of 70 cm from the subject's eyes and was used to display stimuli during the decision-making task. Left and right forearms were rested upon the surface of the table with the palms facing the table. A computer keyboard was positioned upside-down under the dominant (*i.e.*, right) hand with the response keys F9 and F8 under the index and middle fingers, respectively (see Figure 1).

### Task

The task used in the current study is a variant of the "tokens task" (Cisek et al., 2009) and was implemented by means of LabView 8.2 (National Instruments, Austin, TX). The sequence of events in each trial is depicted in Figure 1. Between trials, subjects were always presented with a default screen consisting of three circles (4.5 cm diameter), displayed for 2000 ms on a white background. Fifteen randomly arranged tokens (0.3 cm diameter) then appeared in the central circle. After a delay of 800 ms, the tokens began to jump, one-by-one

every 200 ms from the center to one of the two lateral circles (*i.e.*,  $\text{Jump}_1$  to  $\text{Jump}_{15}$ ). The subjects' task was to indicate by a right index or right middle finger key-press which lateral circle they thought would ultimately receive the majority of the tokens (*i.e.*, F9 and F8 key-presses to choose left and right circles, respectively). They could provide their response as soon as they felt sufficiently confident, but between  $\text{Jump}_1$  and  $\text{Jump}_{15}$ . Once the response was provided, the tokens kept on jumping every 200 ms until the central circle was empty. At this time, the selected circle was highlighted either in green or in red depending on whether the response was correct or incorrect, respectively, and a score was displayed above the central circle to provide the subjects with further feedback of their performance. In correct trials, subjects received a positive score (*i.e.*, a monetary reward) which was equal to the number of tokens remaining in the central circle at the time of the response (in € cents). Conversely, incorrect responses led to a fixed penalty of 7 cents, regardless of the RT. Thus, the longer the subjects waited to provide a response, the lower was the reward/penalty ratio, generating an increasing sense of urgency as time passed within each trial. In the absence of any response before  $\text{Jump}_{15}$ , the central circle was highlighted in red and a "Time Out" (TO) message appeared on the top of the screen. The subjects were neither rewarded nor penalized in these trials. The feedback cue remained on the screen for 1000 ms and then disappeared at the same time as the tokens did, denoting the end of the trial. Subjects were told that they would receive a monetary reward at the end of the experiment corresponding to their final score. Each trial lasted 6600 ms.

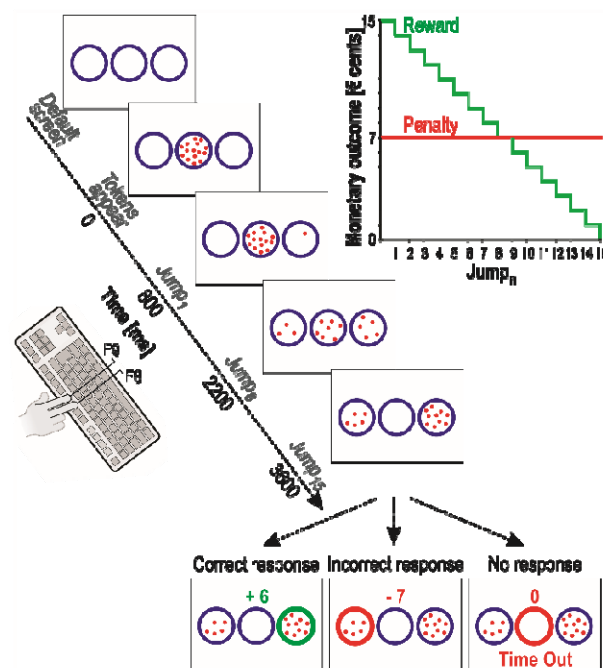

**Figure 1: Schematic of the tokens task.** In each trial, 15 tokens jumped one-by-one every 200 ms from the central circle to one of the two lateral circles (*i.e.*,  $\text{Jump}_1$  to  $\text{Jump}_{15}$ ). The subjects had to indicate by a right index or right middle finger key-press (*i.e.*, F9 and F8 keys, respectively) which lateral circle they thought would receive more tokens (*i.e.*, left or right circle, respectively) at the end of the trial. They could provide their response whenever they wanted between  $\text{Jump}_1$  and  $\text{Jump}_{15}$ . For a correct response, the subjects earned, in € cents, the number of tokens remaining in the central circle at the time of the response. Hence, the reward received for a correct response decreased over time, as depicted on the upper right side of the figure (green trace). The example presented on the lower left side of the figure represents a correct response provided between  $\text{Jump}_9$  and  $\text{Jump}_{10}$  (*i.e.*, the score indicates that 6 tokens remained in the central circle at the moment the right circle was chosen). In contrast, if subjects chose the incorrect lateral circle, they lost 7 € cents, regardless of

*their RT. As such, the penalty score was fixed, as shown in red on the upper right side of the figure: the lower middle example represents an incorrect choice of the left circle. Thus, the reward/penalty ratio decreased over time, producing an increasing sense of urgency over the course of a trial. In the absence of response (“Time Out” trial, lower right side example), subjects were neither rewarded, nor penalized (score = 0). For representative purposes, the “Time Out” message is depicted below the circles in this example, while it was presented above them in the experiment.*

## **Blocks and sessions**

The study included 3 sessions, conducted on separate days at a 24-hour interval. Testing always occurred at the same time of the day for a given subject, to avoid variations that could be due to changes in chronobiologic states (Derosiere et al., 2015a; Schmidt et al., 2006). Each session comprised 4 blocks of 50 trials, with each block lasting about 5.5 minutes. Subjects also performed 4 blocks of 5 trials of a simple reaction time (SRT) task, two at the beginning and two at the end of each session. In the SRT task, subjects were presented with the same display as in the tokens task described above. However, after 50 ms in the central circle, the 15 tokens all jumped together into one of the two lateral circles at the same time. Subjects were instructed to respond to this “GO signal” by pressing the corresponding key as fast as possible. Importantly, the 15 tokens always jumped into the same lateral circle in all trials of a given SRT block and subjects were told which lateral circle this would be in advance. This SRT task allowed us to estimate the sum of the delays attributable to the motor processes ensuing from commitment to an action in the absence of a choice (see Cisek et al., 2009; Thura et al., 2014).

Day 1 served as a training session. Day 2 and 3 corresponded to the actual experimental sessions with the cTBS intervention (Figure 2). cTBS was applied before subjects engaged in the blocks of trials, either over the left M1 hand area (M1-Disruption session) or over the right primary somatosensory cortex (S1), 2 cm behind the right M1 area (Sham session; Derosiere et al., 2014; Alexandre et al., 2015; Torta et al., 2013), in a randomized order. The Sham session allowed us to ensure that the putative behavioral effects observed following M1 cTBS were not due to the tactile and auditory sensations elicited by the TMS pulses (Derosiere et al., 2017a, 2017b).

## **TMS procedure**

TMS was delivered through a 2x75 mm figure-of-eight coil connected to a Magpro X100 Stimulator (Magventure Company, Farum, Denmark). The coil was placed tangentially on the scalp with the handle oriented towards the back of the head and laterally at a 45° angle away from the midline. At the beginning of each session, M1 was localized by identifying the optimal spot for eliciting MEPs in the first dorsal interosseous (FDI) muscle of the right hand (M1-Disruption session) or the left hand (Sham session). This site (called the “hotspot”) was marked on an electroencephalography cap fitted on the participant’s head to provide a reference point throughout the session (Duque et al., 2010, 2014; Vandermeeren et al., 2009). We then determined the resting motor threshold (rMT) at the hotspot. The rMT was defined as the minimal intensity required to evoke MEPs of 50  $\mu$ V peak-to-peak in the targeted muscle on 5 out of 10 consecutive trials (Grandjean et al., 2018; Rothwell et al., 1991; Rossini et al., 1994, 2015; Vassiliadis et al., 2018).



The cTBS procedure consisted of a series of short TMS trains (three pulses at 50 Hz) repeated every 200 ms for a total duration of 40 s (600 pulses) at an intensity of 80 % of rMT (Derosiere et al., 2017a, 2017b; Huang et al., 2005; Solopchuk et al., 2017). Such an intervention has been shown to inhibit the stimulated cortical area, producing a temporary “virtual lesion”, often effective as soon as the train is over (Derosiere et al 2017a, 2017b; Do et al., 2018; Sasaki et al. 2018) and lasting for between 20 (Clerget et al., 2011; Oberman et al., 2011; Zénon et al., 2015) and 45 minutes (Huang et al., 2005).

In order to monitor the inhibitory effect of cTBS on motor activity, single TMS pulses were applied at the M1 hotspot at 115 % of the rMT to elicit MEPs at different time points in the M1-Disruption and Sham sessions (Klein et al., 2014; Labruna et al., 2014; Quoilin et al., 2016, 2017). In the M1-Disruption session, MEPs were recorded in the right FDI following TMS over left M1, to evaluate the impact of left M1 cTBS on left motor excitability. In the Sham session, MEPs were obtained from the left FDI following TMS over right M1, to control for the absence of effect of right S1 cTBS on right M1 excitability.

The time points at which MEPs were elicited in the M1-Disruption and Sham sessions were comparable (see Figure 2). In both sessions, 20 MEPs were elicited at the beginning of the session (*i.e.*, just before cTBS; TMS<sub>Baseline</sub>). Then, 15 MEPs were elicited just following cTBS (TMS<sub>1</sub>), after the two initial SRT blocks (TMS<sub>2</sub>), and after each block of trials of the tokens task (TMS<sub>3-6</sub>). Finally, 20 additional MEPs were evoked following the two last SRT blocks (TMS<sub>7</sub>). These seven timings (TMS<sub>1-7</sub>) fell 1 min, 3 min, 11 min, 19 min, 27 min, 35 min, and 37 min after the cTBS intervention, respectively.

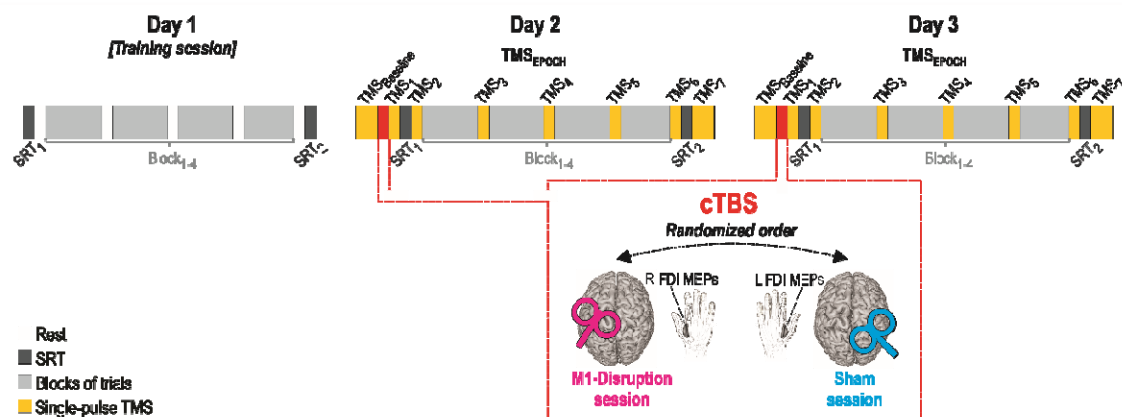

**Figure 2: Experimental protocol.** Subjects came to the lab for 3 consecutive days (Day 1, 2 and 3). On each day, they performed the tokens task during 4 blocks of 50 trials (Block<sub>1-4</sub>; light grey rectangles). They also performed Simple Reaction Time blocks at the beginning and at the end of each session (SRT<sub>1</sub> and SRT<sub>2</sub>, respectively; dark grey rectangles). Day 1 served as a training session and did not involve any continuous Theta Burst Stimulation (cTBS). A cTBS train was applied for 40 s at the beginning of Day 2 and 3 (red rectangles), either over the left (L) primary motor cortex (M1-Disruption session, magenta coil) or over the right (R) primary somatosensory cortex (Sham session, cyan coil), in a randomized order. Motor Evoked Potentials (MEPs) were elicited at different time points (TMS<sub>EPOCHS</sub>) throughout the sessions (TMS<sub>Baseline</sub> and TMS<sub>1-7</sub>, yellow rectangles), either in the R first dorsal interosseous (FDI) muscle (M1-Disruption session) or in the L FDI (Sham session), by applying single-pulse TMS over the L or R M1, respectively. Note that in the Sham session, this implied targeting different sites for the cTBS intervention (R S1) and the MEP assessments (R M1; coil position not shown on the figure).

## Data collection

Electromyography (EMG) was used to measure the peak-to-peak amplitude of FDI MEPs elicited by single TMS pulses over the contralateral M1. EMG activity was recorded from surface electrodes placed over the right FDI or the left FDI (M1-Disruption or Sham sessions, respectively). EMG data were collected for 1000 ms on each trial, starting 300 ms before the TMS pulse. EMG signals were amplified, bandpass filtered on-line (10-500 Hz) and digitized at 2000 Hz for off-line analysis.

## Data analysis

### *Motor evoked potential data*

MEP data were collected with Signal (Signal 3.0, Cambridge, UK) and analyzed with custom Signal scripts. MEP amplitudes were measured for each TMS pulse. Trials with background EMG activity greater than 20  $\mu$ V on average (root mean square, rms), in the 200-ms window preceding the TMS artifact, were excluded from the analysis.  $3.63 \pm 5.43$  % of trials were discarded based on this criterion. The amplitude of MEPs elicited at each time point was averaged to obtain a measure of motor excitability at TMS<sub>Baseline</sub> and at TMS<sub>1-7</sub> in the M1-Disruption and Sham sessions (Figure 2). For each session, we then expressed MEP amplitudes obtained at TMS<sub>1-7</sub> (*i.e.*, after the cTBS intervention) in percentage of the amplitudes measured at TMS<sub>Baseline</sub> (*i.e.*, before the cTBS intervention).

The disruptive impact of cTBS on cortical activity varies between subjects (Do et al., 2018; Jannati et al., 2017; Rocchi et al., 2018). Here, we aimed at only including individuals in which cTBS effectively disrupted M1. To do so, we discarded subjects presenting percentage MEP amplitudes exceeding 2.5 SD *above* the mean of the group in the M1-disruption session at one of the TMS<sub>EPOCHS</sub> or more. This led to the rejection of three subjects, who exhibited average MEP amplitudes of  $148.3 \pm 12.5$  %,  $139.5 \pm 10.6$  % and  $188.6 \pm 20.9$  % following the cTBS intervention in the M1-disruption session (all TMS<sub>EPOCHS</sub> averaged together), reflecting thus a large increase (rather than the targeted decrease) in motor excitability. The analyses of the MEP and behavioral data were performed on the remaining pool of subjects ( $n = 16$ ).

### *Behavioral data*

Behavioral data were collected with LabVIEW 8.2 (National Instruments, Austin, TX), stored in a database (Microsoft SQL Server 2005, Redmond, WA), and analyzed with custom MATLAB scripts (MathWorks, Natick, MA). Because Day 1 served as a training session (see section *Blocks and sessions*), the behavioral analyses focused on the data acquired on Day 2 and 3 (*i.e.*, in the M1-Disruption and Sham sessions).

### *SRT task*

For each subject, we computed the mean SRT for both fingers (right index and right middle fingers), defined as the difference between the time at which subjects pressed the key and the time at which the 15 tokens appeared simultaneously in the lateral circle, obtained at the beginning (SRT<sub>1</sub>) and at the end (SRT<sub>2</sub>) of each session. This SRT allowed us to quantify



the impact of M1 cTBS on the motor processes that follow commitment to an action in the absence of a choice.

### *Tokens task*

#### Classification of the trial types based on the temporal profile of the success probability

The task allows us to calculate, at each moment in time, the “success probability”  $p_i(t)$  associated with choosing each lateral circle  $i$ . For a total of 15 tokens, if at a particular moment in time the right (R) circle contains  $N_R$  tokens, the left (L) circle contains  $N_L$  tokens, and the central (C) circle contains  $N_C$  tokens, then the probability that the circle on the right will ultimately be the correct one is described as follows:

$$p(R|N_R, N_L, N_C) = N \frac{N_C!}{2^{N_C}} \sum_{k=0}^{\min(N_C, 7-N_L)} \frac{1}{k! (N_C - k)!} \quad (1)$$

For some of the analyses, we grouped trials according to the temporal profile of  $p_i(t)$ . That is, although the side of each token jump was completely random in each trial, we could classify some trials as belonging to one of two specific types a posteriori. Trials were categorized as “obvious” when the  $p_i(t)$  was above 0.6 after Jump<sub>2</sub> and above 0.75 after Jump<sub>5</sub>; that is, the initial token jumps consistently favored the correct circle. Other trials were categorized as “ambiguous” when the initial jumps were balanced between the lateral circles, keeping the  $p_i(t)$  close to 0.5 until late in the trial:  $p_i(t)$  remained between 0.5 and 0.66 up to Jump<sub>7</sub> in these trials.

#### Decision Time (DT), percentage of correct choices (%Correct) and percentage of time out trials (%TO)

For each session (M1-Disruption and Sham) and each trial type (obvious and ambiguous; trials that were neither obvious nor ambiguous were not considered here), we analyzed the following behavioral variables: the decision time (DT), the percentage of correct choices (%Correct) and the percentage of time out trials (%TO). To evaluate the DT, we first calculated the RT during the tokens task by computing the difference between the time at which subjects pressed the key and Jump<sub>1</sub>. We then subtracted from this tokens RT, the mean RT obtained in the SRT task on the same day (SRT<sub>1</sub> and SRT<sub>2</sub> pooled together), providing us with an estimate of DT, reflecting the duration of the deliberation process for each subject. Note that we used a monetary reward in the tokens but not in the SRT task, which might have led us to slightly underestimate the DT. That is, previous studies have shown that monetary reward can boost motor processes (Reppert et al., 2018; Summerside et al., 2018; Yoon et al., 2018). Hence, the latter might have been faster in the tokens than in the SRT task used to estimate it. Thus, we might have subtracted a too large value from the tokens RT, shortening the DT. Still, this putative underestimation of DT applies for both the M1-disruption and the Sham sessions and has thus no biasing impact on our data.

#### Sensory evidence at decision time (DT)

Sensory evidence refers to the available information supporting the correct choice. In the tokens task, the sensory evidence is determined by the difference between the number of tokens in each lateral circle; the more the correct circle contains a large number of tokens, compared to the other lateral circle, the higher the evidence. Given that tokens jump one by one in this task, sensory evidence changes after each jump. We can estimate the evidence based on which subjects made their decision by computing after each jump a first-order approximation of the real probability function (equation 1), called the sum of log-likelihood ratios (SumLogLR), and then compute this quantity at decision time (Cisek et al., 2009):

$$SumLogLR(n) = \sum_{k=1}^n \log \frac{p(e_k|S)}{p(e_k|U)} \quad (2)$$

In this equation,  $p(e_k|S)$  is the likelihood of a token event  $e_k$  (a token jumping into either the selected or unselected lateral circle) during trials in which the selected lateral circle  $S$  is correct and  $p(e_k|U)$  is the likelihood of  $e_k$  during trials in which the unselected circle  $U$  is correct. The SumLogLR is proportional to the difference between the number of tokens that moved towards each lateral circle before the decision. Hence, the lower the amount of sensory evidence in favor of the chosen lateral circle, the lower the SumLogLR.

To characterize the decision policy of the subjects in the Sham and M1-Disruption sessions, we determined the level of sensory evidence at the time of commitment (*i.e.*, at DT). To do so, we binned trials as a function of the total number of tokens that moved before the decision, and calculated the average SumLogLR for each bin as performed in previous studies exploiting the tokens task (*e.g.*, Thura and Cisek, 2014, 2017). Seven bins were defined, with the first bin (Bin<sub>1</sub>) including responses provided between Jump<sub>5</sub> and Jump<sub>6</sub>, the second bin (Bin<sub>2</sub>) including responses provided between Jump<sub>6</sub> and Jump<sub>7</sub> and so on, until the last bin (Bin<sub>7</sub>) covering the period between Jump<sub>11</sub> and Jump<sub>12</sub>. SumLogLR at DT preceding Jump<sub>5</sub> or following Jump<sub>12</sub> were not considered for this analysis because part of the subjects did not respond at these timings. Importantly, the SumLogLR at DT was computed based on every trial where a response was provided (*i.e.*, for correct and incorrect responses, in obvious and ambiguous trials, as well as in other trials with different  $p_i(t)$ ).

### Estimation of urgency functions

According to recent models of decision-making, action choices result from the combination of signals that track the available sensory evidence and the level of urgency that grows over time (Cisek et al., 2009, Ditterich, 2006, Drugowitsch et al., 2012). A direct prediction of such urgency-based models is that decisions made with lower levels of evidence should be associated with higher levels of urgency. Hence, we exploited the SumLogLR at DT values to estimate an urgency function for each subject and each block condition. To do so, we rectified the SumLogLR at DT (*i.e.*, by multiplying it by -1 and adding a constant of 3) and then fitted a linear regression over the rectified values. We then extracted the intercept and the slope of these urgency functions, which we used as estimates of the initial level and the growth rate of the urgency signal, respectively. Second-order polynomial regressions were also performed on the rectified SumLogLR data but did not yield significantly better fits (*i.e.*, group-level Bayesian Information Criterion [BIC] values for linear and polynomial fits were  $5.75 \pm 1.61$  and  $5.74 \pm 1.79$  a.u., respectively;  $t_{14} = 0.02$ ,  $p = .984$ ).

## Statistical analysis

All statistical analyses were performed with custom R Scripts (R Version 3.4.1, Car and BayesFactor packages). All data were examined for normality and homogeneity of variance using Skewness, Kurtosis and Brown-Forsythe tests.

MEP data (expressed in percentage of  $TMS_{Baseline}$ ) were analyzed using a two-way repeated-measure ANOVA ( $ANOVA_{RM}$ ) with SESSION (M1-Disruption, Sham) and  $TMS_{EPOCH}$  ( $TMS_1$ ,  $TMS_2$ ,  $TMS_3$ ,  $TMS_4$ ,  $TMS_5$ ,  $TMS_6$ ,  $TMS_7$ ) as within-subject factors. Additional Bonferroni-corrected single-sample Student's t-tests against 100 % were realized for each  $TMS_{EPOCH}$  to test for any significant suppression of MEP amplitudes in the M1-Disruption and in the Sham session.

The SRT data were analyzed using a two-way  $ANOVA_{RM}$  with SESSION (M1-Disruption, Sham) and  $SRT_{EPOCH}$  ( $SRT_1$ ,  $SRT_2$ ) as within-subject factors. The DT, the %Correct and the %TO data were analyzed using two-way  $ANOVA_{RM}$  with SESSION (M1-Disruption, Sham) and TRIAL (obvious, ambiguous) as within-subject factors. The SumLogLR at DT was analyzed using a two-way  $ANOVA_{RM}$  with SESSION (M1-Disruption, Sham) and BIN ( $Bin_1$  to  $Bin_7$ ) as within-subject factors. When appropriate, Fisher's LSD post-hoc tests were used to detect paired differences in these ANOVAs. Furthermore, the intercept and the slope of the urgency functions were compared between each session using Student's t-tests. The significance level for these tests was set at  $p < .05$ . Results are expressed as mean  $\pm$  SE.

## RESULTS

### Motor evoked potential data

The  $ANOVA_{RM}$  revealed a main effect of the factor SESSION on the percentage MEP amplitudes ( $F_{1,15} = 15.41$ ;  $p = .001$ ; see Figure 3). As such, percentage MEP amplitudes were lower following cTBS in the M1-Disruption session ( $78.78 \pm 3.04$  %) than in the Sham session ( $105.53 \pm 5.32$  %;  $TMS_{1-7}$  timings pooled together). The effect size (Cohen's d) for this factor was 1.5 indicating a large effect of SESSION (Cohen, 1988). This effect on percentage MEP amplitudes did not depend on time as the  $ANOVA_{RM}$  did not reveal any effect of the factor  $TMS_{EPOCH}$  ( $F_{6,90} = 1.99$ ,  $p = .075$ ) nor interaction with the factor SESSION ( $F_{6,90} = 0.72$ ,  $p = .637$ ). Hence, percentage MEP amplitudes remained stable following the cTBS intervention; they were consistently lower in the M1-Disruption than in the Sham session, regardless of the time at which MEPs were considered during the course of the experiment.

Additional single-sample Student's t-tests against 100 % (run for each  $TMS_{EPOCH}$ ; Bonferroni-corrected at  $p < .0035$ ) showed that, as expected, the difference in MEP amplitude between the two sessions reported above was due to a selective suppression of MEPs in the M1-Disruption but not in the Sham session. As such, percentage MEP amplitudes were significantly lower than 100 % at almost all timings in the M1-Disruption session, except for  $TMS_5$  and  $TMS_7$  (*i.e.*, at  $TMS_{1-4}$  and  $TMS_6$ ; all p-values = [.000008 .002]). Conversely, amplitudes were never significantly different from 100 % (*i.e.*, from  $TMS_{Baseline}$ ) in the Sham session (all p-values = [.163 .826]).

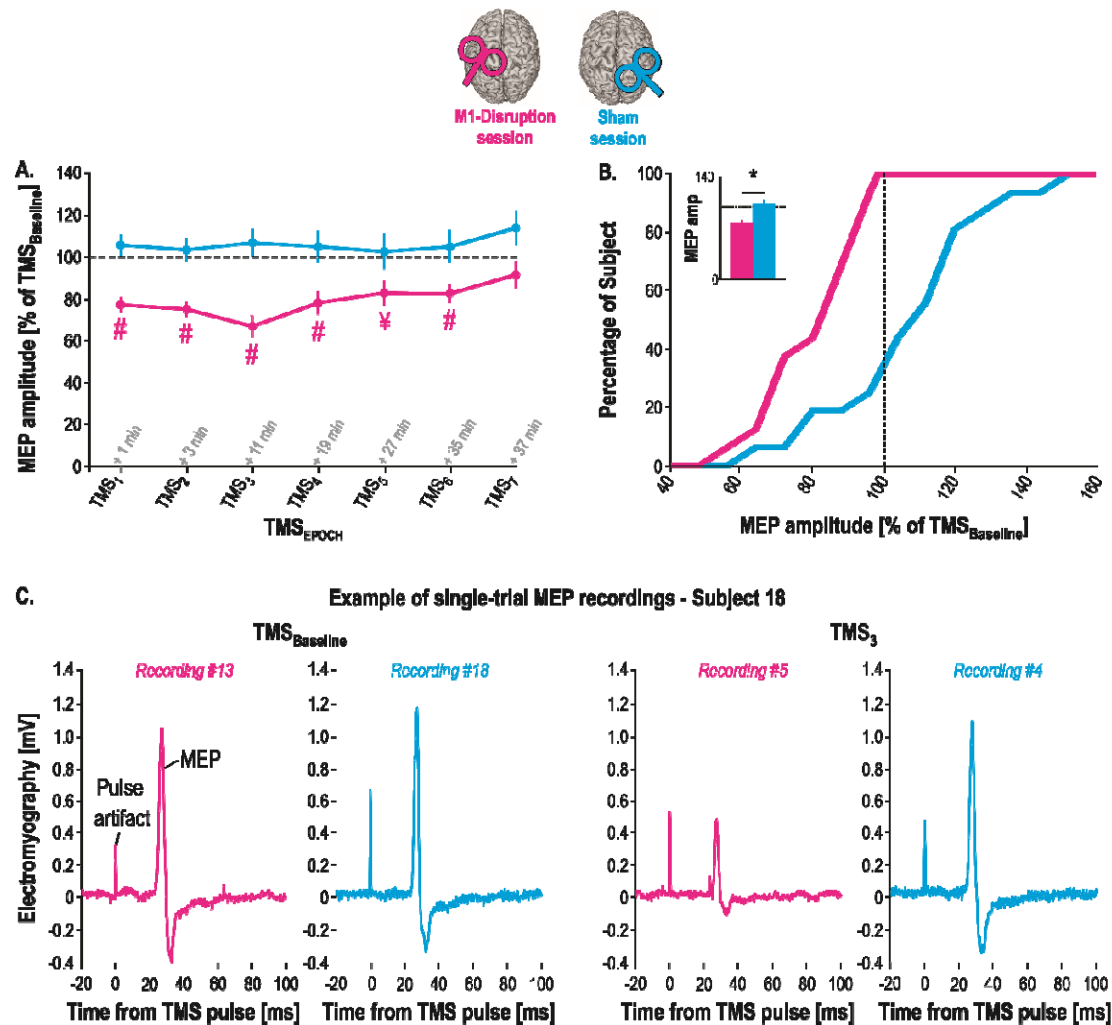

## Behavioral data

### *SRT Task*

The ANOVA<sub>RM</sub> revealed a main effect of the factor SESSION on the SRT data ( $F_{1,15} = 5.34$ ,  $p = .035$ ; see Figure 4.A). Indeed, SRTs were significantly prolonged in the M1-Disruption session ( $237.3 \pm 7.4$  ms) compared to the Sham session ( $220.8 \pm 5.6$  ms; SRT<sub>1</sub> and SRT<sub>2</sub> pooled together). The effect size (Cohen's  $d$ ) for this factor was 0.6 indicating a medium to large effect of SESSION. The impact of M1 disruption on SRTs did not vary over the course of the session. As such, the ANOVA<sub>RM</sub> did not reveal any significant effect of the factor SRT<sub>EPOCH</sub> ( $F_{1,15} = 0.02$ ,  $p = .892$ ) nor of its interaction with the factor SESSION ( $F_{1,15} = 1.78$ ,  $p = .202$ ). These findings indicated that M1-disruption altered the motor processes underlying initiation and/or execution of the cued movements (Huang et al., 2005; Lakhani et al., 2014; McAllister et al., 2013).

### *Tokens task*

#### Decision time (DT)

As expected, the ANOVA<sub>RM</sub> revealed a main effect of the factor TRIAL on the DT data ( $F_{1,15} = 119.30$ ,  $p < .00001$ ; see Figure 4.B). Indeed, DTs were significantly shorter in obvious trials ( $871.77 \pm 57.14$  ms) than in ambiguous ones ( $1426.57 \pm 88.59$  ms; M1-Disruption and Sham sessions pooled together). Importantly, the ANOVA<sub>RM</sub> did not reveal any significant effect of the factor SESSION ( $F_{1,15} = 0.24$ ,  $p = .631$ ) nor of its interaction with the factor TRIAL ( $F_{1,15} = 0.02$ ,  $p = .888$ ). Hence, the time taken by the subjects to deliberate depended on the trial type they encountered (*i.e.*, obvious vs ambiguous) but was not affected by M1 disruption.

#### Percentage of correct choices (%Correct)

We found a significant main effect of the factor TRIAL for the %Correct data ( $F_{1,15} = 31.727$ ,  $p = .00005$ ; see Figure 4.C). Indeed, %Correct was significantly higher in obvious trials ( $99.80 \pm 0.13$  %) than in ambiguous ones ( $88.61 \pm 1.80$  %; M1-Disruption and Sham sessions pooled together). However, neither the factor SESSION ( $F_{1,15} = 0.05$ ,  $p = .497$ ) nor its interaction with the factor TRIAL were significant ( $F_{1,15} = 0.44$ ,  $p = .517$ ). Hence, M1 disruption did not alter the accuracy of the decision process.

#### Percentage of Time Out trials (%TO)

The %TO data revealed a similar pattern as the variables described above. Indeed, the %TO was significantly lower in obvious ( $0.20 \pm 0.13$  %) than in ambiguous trials ( $4.43 \pm 1.42$  %; M1-Disruption and Sham sessions pooled together), as confirmed by the ANOVA<sub>RM</sub> (factor TRIAL:  $F_{1,15} = 7.47$ ,  $p = .015$ ; see Figure 4.D). Moreover, there was no effect of the factor SESSION ( $F_{1,15} = 0.01$ ,  $p = .920$ ) or interaction with the factor TRIAL ( $F_{1,15} = 0.01$ ,  $p = .922$ ). Hence, the proportion of trials in which subjects refrained from responding was unaffected by M1-Disruption.

#### Sensory evidence at decision time (SumLogLR at DT) and urgency

The amount of sensory evidence based on which subjects made their decision was estimated using the SumLogLR (computed at DT): the higher the SumLogLR, the higher the evidence at DT (Cisek, 2009; Thura et al., 2012, 2014). SumLogLR values are presented for each  $\text{Bin}_n$  on Figure 4.E (see *Methods*), separately for the M1-Disruption and the Sham sessions. Note that two subjects were excluded from this analysis as they responded too early on most trials, resulting in a lack of SumLogLR values after  $\text{Jump}_9$  in these participants. Hence, SumLogLR analyses were run on 14 subjects.

Overall, fast decisions were made based on more sensory evidence than slow decisions, as confirmed by the ANOVA<sub>RM</sub> showing a main effect of the factor BIN on the SumLogLR at DT ( $F_{6,78} = 12.86$ ,  $p < .00001$ ; see Figure 4.E; BF value above 100). Indeed, the SumLogLR at DT was significantly higher at  $\text{Bin}_1$  ( $1.18 \pm 0.06$  a.u.) than for any other bin after  $\text{Bin}_4$  (all SumLogLR at DT  $\leq 0.84 \pm 0.05$  a.u.; M1-Disruption and Sham sessions pooled together). Hence, the amount of sensory evidence based on which subjects made their choices decreased as a function of time. Here again, the ANOVA<sub>RM</sub> did not reveal any significant effect of the factor SESSION ( $F_{6,78} = 0.04$ ,  $p = .852$ ) nor of its interaction with the factor BIN ( $F_{6,78} = 0.41$ ,  $p = .868$ ). Hence, subjects made their decisions based on a similar amount of sensory evidence in both sessions, suggesting a preservation of the urgency drive during deliberation with M1 disruption.

To further confirm this finding, we obtained a simple approximation of the urgency signal underlying the subjects' decisions by fitting a linear regression over the rectified version of SumLogLR at DT for each session (M1-Disruption, Sham) and extracted the intercept and the slope of the regression functions (see section *Methods* and Figure 4. F, G and H). Again, student t-tests did not reveal any significant impact of the session on the intercept ( $t_{14} = 0.48$ ,  $p = .798$ ) or the slope ( $t_{14} = -0.22$ ,  $p = .832$ ) of the urgency functions.



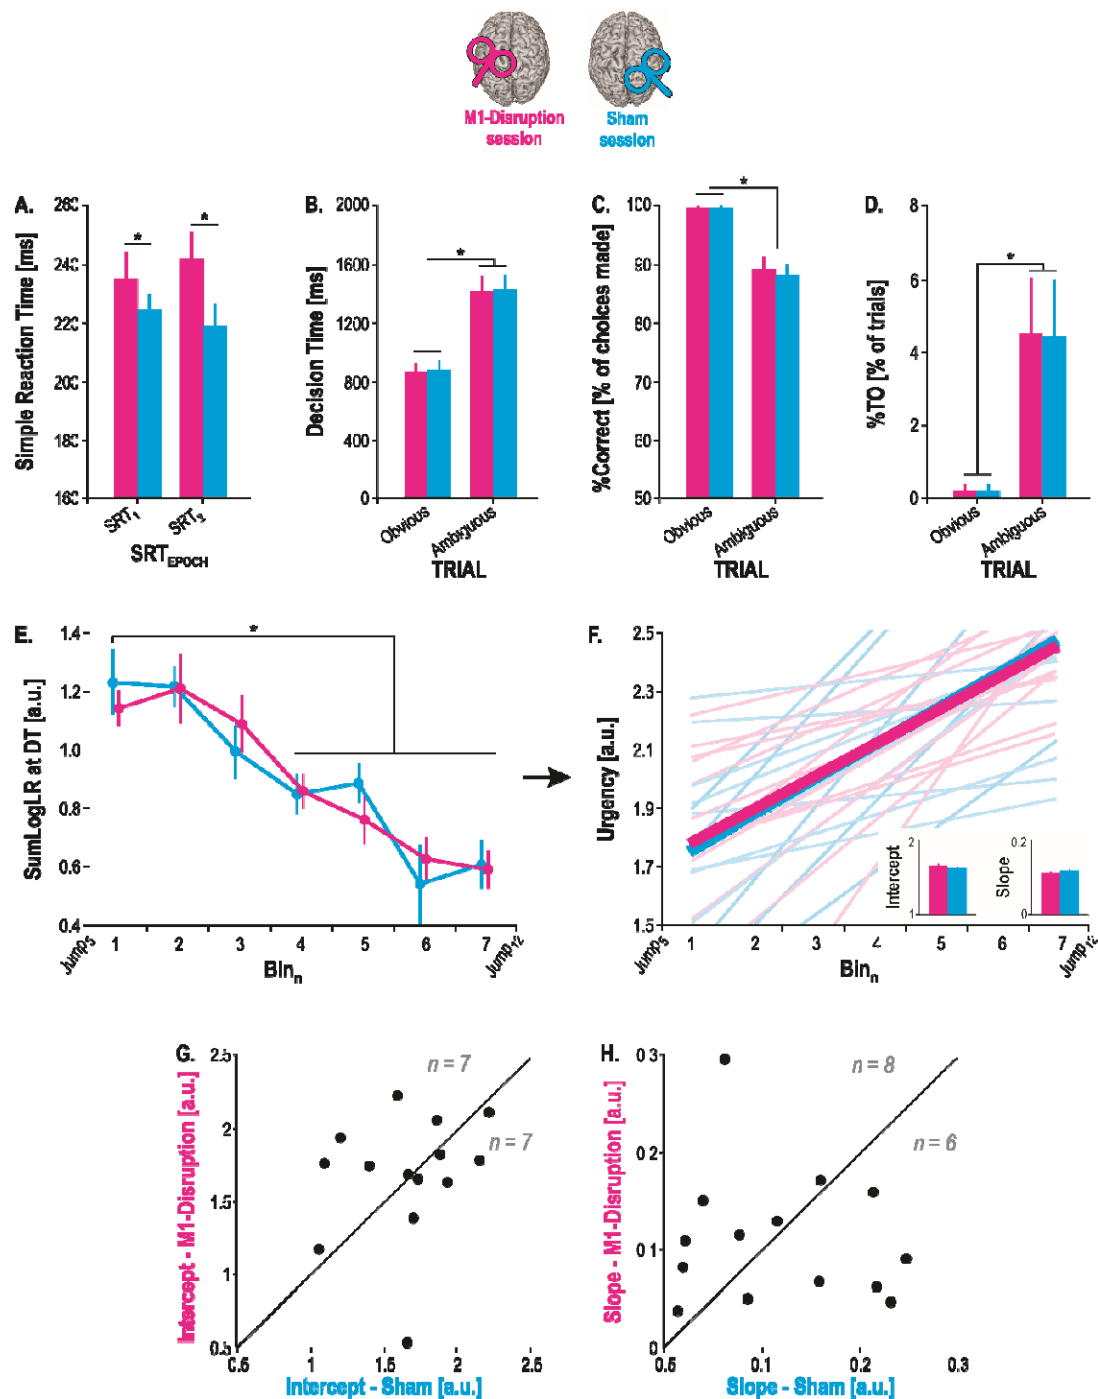

**Figure 4: Behavioral results.** **A.** Mean Simple Reaction Time (SRT) (obtained in the SRT task) measured at each of the  $SRT_{EPOCHS}$  ( $SRT_{1-2}$ ) in the M1-Disruption (magenta bars) and Sham (cyan bars) sessions. **B.** Mean Decision Time (DT) measured in each TRIAL (obvious, ambiguous) in the M1-Disruption (magenta bars) and Sham (cyan bars) sessions. **C and D** same as B for the percentages of correct choices (%Correct) and of Time Out trials (%TO), respectively. **E.** SumLogLR at DT measured in each  $Bin_n$  of decision time (i.e., between  $Jump_5$  and  $Jump_{12}$ , see main text) in the M1-Disruption (magenta traces) and Sham (cyan traces) sessions. **F.** Urgency functions computed based on the rectified SumLogLR at DT for the M1-Disruption (magenta traces) and Sham (cyan traces). **G.** Intercept - M1-Disruption [a.u.] vs Intercept - Sham [a.u.] ( $n = 7$ ). **H.** Slope - M1-Disruption [a.u.] vs Slope - Sham [a.u.] ( $n = 8$ ).

sessions. The small bar graphs on the bottom right represent the group-level average intercept and slope of the functions. Light lines illustrate individual estimated urgency functions, bold lines illustrate the mean urgency functions averaged across population. **G. Individual intercept values**, represented for the M1-Disruption Session (y-axis) as a function of the values for the Sham session (x-axis). Points above the diagonal ( $n = 7/14$ ) represent the subjects showing a higher intercept in the M1-Disruption than following Sham session, while points below the diagonal ( $n = 7/14$ ) represent the subjects showing a lower intercept in the M1-Disruption than following Sham session. **H.** Same as G. for the slope values. \*: significant difference ( $p < .05$ ). Error bars represent SE.

### Verifying that M1 disruption does not impact deliberation using Bayesian analyses

The ANOVA<sub>RM</sub> and the t-tests revealed that M1 disruption did not significantly alter the behavioral data measured in the tokens task, suggesting that M1 is not functionally involved in the deliberation process underlying action choices. In order to confirm this result, a Bayes Factor (BF) was computed for each analysis involving the factor SESSION (10 BF values obtained in total), providing us with a ratio of the likelihood probability of the null hypothesis (*i.e.*, H0: the probability that data do not exhibit an effect of SESSION) over the alternative hypothesis (*i.e.*, H1: the probability that data exhibit the effect; Morey and Rouder 2011). A BF value of 1 would reflect an equal probability that H0 and H1 are correct, while a BF value above 1 would reflect a higher probability that H0 is correct. In accordance with conventional interpretation of BF values (Jeffreys, 1961), a BF value ranging between 1 and 3 is interpreted as indicating *anecdotal* evidence in favor of H0, a value between 3 and 10 as indicating *substantial* evidence for H0 and a value between 10 and 30 a *strong* evidence for H0.

Table 1 summarizes the BF values obtained for each factor tested. The average BF value was of  $5.66 \pm 1.74$  (all BFs ranged between 3.46 and 21.28) indicating substantial to strong evidence for an absence of difference in subjects' behavior between the M1-Disruption and the Sham sessions. Hence, Bayesian analyses further reinforce the conclusion that M1 disruption did not influence the deliberation process underlying decision-making, but solely altered the motor processes that ensue commitment to an action.

| Factor tested | DT   | %Correct | %TO  | SumLogLR | Urgency Intercept | Urgency Slope |
|---------------|------|----------|------|----------|-------------------|---------------|
| SESSION       | 3.87 | 3.77     | 3.91 | 5.23     | 3.46              | 3.48          |
| SESSION*TRIAL | 3.91 | 3.77     | 3.91 | ---      | ---               | ---           |
| SESSION*TIME  | ---  | ---      | ---  | 21.28    | ---               | ---           |

**Table 1: Bayes factor (BF) values.** The first column specifies the factors tested for which a BF was computed. Other columns represent the BFs obtained for each behavioral measure in the tokens task. Overall, BFs ranged between 3.46 and 21.28 indicating substantial to strong evidence for a lack of effect of the SESSION on subjects' behavior.

## DISCUSSION

Previous studies have shown that neural activity in motor cortical areas, including M1, is strongly altered during decisions between actions (Alamia et al., 2018; Derosiere et al., 2018; Donner et al., 2009; Gould et al., 2012; Klein-Flügge et al., 2012; Murphy et al., 2016; Steinemann et al., 2018, Thura and Cisek, 2014a, 2016; Tosoni et al., 2008, 2014; Wyart et al., 2012). To date, however, the specific contribution of motor cortical areas to the decision process remains debated. Here, we asked whether M1 causally influences deliberation during action choices, or whether this area mostly contributes to the motor processes overtly expressing commitment. To do so, we tested the impact of a disruption of M1 activity, induced by continuous theta burst stimulation (cTBS), on the behavior of human subjects in (1) a simple reaction time (SRT) task allowing us to estimate the duration of the motor processes and (2) a modified version of the tokens task (Cisek et al., 2009), which allowed us to estimate subjects' time of commitment as well as accuracy criterion.

Subjects were generally faster and more accurate in obvious than in ambiguous trials, suggesting that late decisions relied on weaker sensory evidence compared to early decisions. This is confirmed by the systematic analysis of the sensory evidence available at DT, which indicates that subjects committed to a choice based on less sensory evidence as time elapsed during the course of a trial. This dropping of the accuracy criterion is consistent with previous studies in which similar tasks were used (*e.g.*, Cisek et al., 2009; Gluth et al., 2012; Murphy et al., 2016; Thura et al., 2012, 2014;) and supports recent models postulating that urgency grows over time during speeded decisions (Churchland et al., 2008; Ditterich, 2006, Drugowitsch et al., 2012 Hanks et al., 2011).

The cTBS intervention reduced MEP amplitudes during the entire M1 disruption session, but never following a sham stimulation. Moreover, M1 cTBS lengthened the SRTs (*i.e.*, compared to when sham cTBS was performed), indicating that motor processes that are known to involve M1 were successfully perturbed by the intervention (Huang et al., 2005; Lakhani et al., 2014; McAllister et al., 2013). Notably, in the present study, motor responses were recorded through key-presses. Hence, RTs involved two periods, occurring before and after movement initiation (Spieser et al., 2017). As a consequence, it is sensible to assume that the lengthening of SRT observed here might reflect an increase of (1) the time needed for initiating the required motor response, (2) the duration of the execution, or (3) both.

Critically, all the behavioral data collected in the tokens task were similar in the two cTBS sessions, whether M1 was disrupted or not. This finding suggests that the contribution of M1 to decision making is negligible. Past reports of decision-related changes in M1 are thus likely to reflect the influence of signals coming from upstream structures rather than an actual involvement in the deliberation process itself (Thura and Cisek, 2017; van Maanen et al., 2016). In a similar vein, our recent work shows that M1 disruption negatively alters value-based choices, but only when action values are freshly acquired. Such an effect of M1 disruption does not occur anymore following consolidation. This suggests that M1 contribution to value-based decision-making vanishes as subjects become more proficient at using the value information (Derosiere et al., 2015c; 2017a, 2017b). The causal involvement of M1 may be thus restricted to the motor processes that follow commitment to an action in well-learned decision-making tasks.

If M1 does not influence action selection, where in the brain are decisions about actions determined? Among many possible areas, PMd emerges as a promising candidate. First, single-cell recordings in behaving monkeys have shown that during deliberation, activity of some PMd neurons tuned for a particular action reflects the unfolding sensory evidence favoring that action. This observation also makes it possible that this decision-related activity influences M1 neurons through cortico-cortical projections (Duque et al., 2012; Martinez-Gracia et al., 2015). Second, the same studies found that PMd activity related to the selected

target reaches a peak about 280 ms before movement initiation regardless of decision difficulty, while a peak of M1 activity occurs about 140 ms later (Thura and Cisek, 2014a). Third, neurons in the globus pallidus internus, which are insensitive to sensory information during deliberation, become directionally tuned around the time of the PMd activity peak (Thura and Cisek, 2017). Altogether, these results suggest that PMd might be the primary site where decisions are computed and commitment determined.

In agreement with this hypothesis, a recent study found that microstimulation of PMd neurons alters the deliberation duration, especially if current is applied shortly before commitment time (Thura and Cisek, 2014b). Crucially, stimulation has much less influence on decision duration if it is applied long before commitment or between commitment and movement onset. Relevant for the present work, this microstimulation study also shows similar time-dependent effect of M1 microstimulation on decision durations but the effect size is smaller when M1 is stimulated compared to PMd. Finally, other non-primary motor areas may be causally involved in decision-making, including the pre-supplementary motor area (pre-SMA; Tosun et al., 2017). Investigating their precise contribution represents an interesting issue for future investigations.

We cannot completely rule out the possibility that the cTBS intervention led to some fast reorganization of the decision network following M1 disruption. According to this idea, M1 might still be part of the network involved in the deliberation process but some compensatory mechanisms may have occurred in this network following M1 disruption, leading to similar decision behaviors after M1 and sham cTBS (Bestmann et al., 2004; Briend et al., 2017; Cash et al., 2017; Derosiére et al., 2017a; Rastogi et al., 2017). One solution to tackle this issue in the future would be to exploit online rTMS techniques (Duque et al., 2010, 2013), which could allow one to perturb neural activity at a specific moment during the decision process, leaving less time for compensatory mechanisms to occur. As such, previous work has shown that while online microstimulation of a decision-related area alters behavior during perceptual decision-making (*i.e.*, the lateral intraparietal area; Hanks et al., 2006), (offline) inactivation of the same area does not (Katz et al., 2016).

In conclusion, we show that the offline disruption of M1 activity delays motor processes that follow commitment to an action, but does not alter volitional decision behavior. Taken together, these findings suggest that the contribution of M1 is downstream of the decision process. Future studies should use online disruption protocols and broaden their investigation to the role of non-primary motor areas in deliberation, especially the PMd and the pre-SMA.

## REFERENCES

- Alamia A, Zénon A, VanRullen R, Duque J, Derosiere G.** Implicit visual cues tune oscillatory motor activity during decision-making. *Neuroimage* 186: 424–436, 2019.
- Alexandre F, Derosiere G, Papaiordanidou M, Billot M, Varray A.** Cortical motor output decreases after neuromuscular fatigue induced by electrical stimulation of the plantar flexor muscles. *Acta Physiol* 214: 124–134, 2015.
- Bestmann S, Baudewig J, Siebner HR, Rothwell JC, Frahm J.** Functional MRI of the immediate impact of transcranial magnetic stimulation on cortical and subcortical motor circuits. *Eur J Neurosci* 19: 1950–1962, 2004.
- Briend F, Leroux E, Delcroix N, Razafimandimby A, Etard O, Dollfus S.** Impact of rTMS on functional connectivity within the language network in schizophrenia patients with auditory hallucinations. *Schizophr Res* 189: 142–145, 2017.
- Cisek P, Puskas GA, El-Murr S.** Decisions in changing conditions: the urgency-gating model. *J Neurosci* 29: 11560–71, 2009.
- Clerget E, Andres M, Olivier E.** Deficit in Complex Sequence Processing after a Virtual Lesion of Left BA45. *PLoS One* 8: e63722, 2013.
- Cohen, J.** Statistical Power Analysis for the Behavioral Sciences (2nd ed.). Hillsdale, NJ Lawrence Erlbaum Associates, Publishers. 1988.
- Derosière G, Alexandre F, Bourdillon N, Mandrick K, Ward TE, Perrey S.** Similar scaling of contralateral and ipsilateral cortical responses during graded unimanual force generation. *Neuroimage* 85: 471–477, 2014.
- Derosiere G, Farrugia N, Perrey S, Ward T, Torre K.** Expectations induced by natural-like temporal fluctuations are independent of attention decrement: evidence from behavior and early visual evoked potentials. *Neuroimage* 104: 278–86, 2015a.
- Derosiere G, Zénon A, Alamia A, Klein PA, Duque J.** Contribution of primary motor cortex to perceptual and value-based decision processes. *Front Neurosci* 9, 2015b.
- Derosiere G, Klein P-A, Nozaradan S, Zénon A, Mouraux A, Duque J.** Visuomotor Correlates of Conflict Expectation in the Context of Motor Decisions. *J Neurosci* 38: 9486–9504, 2018.
- Derosiere G, Vassiliadis P, Demaret S, Zénon A, Duque J.** Learning stage-dependent effect of M1 disruption on value-based motor decisions. *Neuroimage* 162: 173–185, 2017a.
- Derosiere G, Zénon A, Alamia A, Duque J.** Primary motor cortex contributes to the implementation of implicit value-based rules during motor decisions. *Neuroimage* 146: 1115–1127, 2017b.
- Ditterich J.** Stochastic models of decisions about motion direction: Behavior and physiology. *Neural Network*. 19: 981–1012, 2006.
- Do M, Kirkovski M, Davies CB, Bekkali S, Byrne LK, Enticott PG.** Intra- and Inter-Regional Priming of Ipsilateral Human Primary Motor Cortex With Continuous Theta Burst Stimulation Does Not Induce Consistent Neuroplastic Effects. *Front Hum Neurosci* 12: 123, 2018.

- Donner TH, Siegel M, Fries P, Engel AK.** Buildup of Choice-Predictive Activity in Human Motor Cortex during Perceptual Decision Making. *Curr Biol* 19: 1581–1585, 2009.
- Drugowitsch J, Moreno-Bote R, Churchland AK, Shadlen MN, Pouget A.** The Cost of Accumulating Evidence in Perceptual Decision Making. *J Neurosci*, 32:3612–3628. 2012.
- Duque J, Labruna L, Cazaes C, Ivry RB.** Dissociating the influence of response selection and task anticipation on corticospinal suppression during response preparation. *Neuropsychologia* 65: 287–296, 2014.
- Duque J, Labruna L, Verset S, Olivier E, Ivry RB.** Dissociating the role of prefrontal and premotor cortices in controlling inhibitory mechanisms during motor preparation. *J Neurosci* 32: 806–16, 2012.
- Duque J, Lew D, Mazzocchio R, Olivier E, Ivry RB.** Evidence for two concurrent inhibitory mechanisms during response preparation. *J Neurosci* 30: 3793–802, 2010.
- Duque J, Olivier E, Rushworth M.** Top–Down Inhibitory Control Exerted by the Medial Frontal Cortex during Action Selection under Conflict. *J Cogn Neurosci* 25: 1634–1648, 2013.
- Economo MN, Viswanathan S, Tasic B, Bas E, Winnubst J, Menon V, Graybiuck LT, Nguyen TN, Smith KA, Yao Z, Wang L, Gerfen CR, Chandrashekar J, Zeng H, Looger LL, Svoboda K.** Distinct descending motor cortex pathways and their roles in movement. *Nature* 563: 79–84, 2018.
- Forstmann BU, Dutilh G, Brown S, Neumann J, von Cramon DY, Ridderinkhof KR, Wagenmakers E-J.** Striatum and pre-SMA facilitate decision-making under time pressure. *Proc Natl Acad Sci* 105: 17538–17542, 2008.
- Gluth S, Rieskamp J, Büchel C.** Deciding not to decide: computational and neural evidence for hidden behavior in sequential choice. *PLoS comp biol* 9:e1003309, 2012.
- Gould IC, Nobre AC, Wyart V, Rushworth MFS.** Effects of Decision Variables and Intraparietal Stimulation on Sensorimotor Oscillatory Activity in the Human Brain. *J Neurosci* 32: 13805–13818, 2012.
- Grandjean J, Derosiere G, Vassiliadis P, De Wilde Y, Quemener L, Duque J.** Towards assessing corticospinal excitability bilaterally: Validation of a double-coil TMS method. *J Neurosci Methods* 293: 162–168, 2018.
- Grent-’t-Jong T, Oostenveld R, Jensen O, Medendorp WP, Praamstra P.** Oscillatory dynamics of response competition in human sensorimotor cortex. *Neuroimage* 83: 27–34, 2013.
- Hanks TD, Ditterich J, Shadlen MN.** Microstimulation of macaque area LIP affects decision-making in a motion discrimination task. *Nat Neurosci* 9: 682–689, 2006.
- Hanks TD, Mazurek ME, Kiani R, Hopp E, Shadlen MN.** Elapsed Decision Time Affects the Weighting of Prior Probability in a Perceptual Decision Task. *J Neurosci* 31:6339–6352, 2011.
- Hauser TU, Moutoussis M, Purg N, Dayan P, Dolan RJ.** Beta-Blocker Propranolol Modulates Decision Urgency During Sequential Information Gathering. *J Neurosci* 38: 7170–7178, 2018.



- Herz DM, Tan H, Brittain JS, Fischer P, Cheeran B, Green AL, ... Foltynie T.** Distinct mechanisms mediate speed-accuracy adjustments in cortico-subthalamic networks. *Elife*, 6, e21481, 2017.
- Huang Y-Z, Edwards MJ, Rounis E, Bhatia KP, Rothwell JC.** Theta Burst Stimulation of the Human Motor Cortex. *Neuron* 45: 201–206, 2005.
- Jannati A, Block G, Oberman LM, Rotenberg A, Pascual-Leone A.** Interindividual variability in response to continuous theta-burst stimulation in healthy adults. *Clin Neurophysiol* 128: 2268–2278, 2017.
- Jeffreys H.** Theory of probability. Clarendon Press. <https://global.oup.com/academic/product/the-theory-of-probability-9780198503682?cc=be&lang=en> [6 Dec. 2018].
- Katz LN, Yates JL, Pillow JW, Huk AC.** Dissociated functional significance of decision-related activity in the primate dorsal stream. *Nature* 535: 285–288, 2016.
- Klein P-A, Olivier E, Duque J.** Influence of reward on corticospinal excitability during movement preparation. *J Neurosci* 32: 18124–36, 2012.
- Klein PA, Petitjean C, Olivier E, Duque J.** Top-down suppression of incompatible motor activations during response selection under conflict. *Neuroimage* 86: 138–149, 2014.
- Klein-Flügge MC, Bestmann S.** Time-dependent changes in human corticospinal excitability reveal value-based competition for action during decision processing. *J Neurosci* 32: 8373–82, 2012.
- Labruna L, Lebon F, Duque J, Klein P-A, Cazaes C, Ivry RB.** Generic inhibition of the selected movement and constrained inhibition of nonselected movements during response preparation. *J Cogn Neurosci* 26: 269–78, 2014.
- Lakhani B, Bolton DAE, Miyasike-daSilva V, Vette AH, McIlroy WE.** Speed of processing in the primary motor cortex: A continuous theta burst stimulation study. *Behav Brain Res* 261: 177–184, 2014.
- Laming DRJ.** Information theory of choice reaction time. Wiley; New York: 1968.
- Martinez-Garcia M, Insabato A, Pannunzi M, Pardo-Vazquez JL, Acuña C, Deco G.** The Encoding of Decision Difficulty and Movement Time in the Primate Premotor Cortex. *PLOS Comput Biol* 11: e1004502, 2015.
- Mcallister CJ, Rönqvist KC, Stanford IM, Woodhall GL, Furlong PL, Hall SD.** Oscillatory Beta Activity Mediates Neuroplastic Effects of Motor Cortex Stimulation in Humans. *J Neurosci* 33: 7919–7927, 2013.
- Michelet T, Duncan GH, Cisek P.** Response Competition in the Primary Motor Cortex: Corticospinal Excitability Reflects Response Replacement During Simple Decisions. *J Neurophysiol* 104: 119–127, 2010.
- Morey RD, Rouder JN.** Bayes factor approaches for testing interval null hypotheses. *Psychol Methods* 16: 406–419, 2011.
- Murphy PR, Boonstra E, Nieuwenhuis S.** Global gain modulation generates time-dependent urgency during perceptual choice in humans. *Nat Commun* 7: 13526, 2016.

- Oberman L, Edwards D, Eldaief M, Pascual-Leone A.** Safety of Theta Burst Transcranial Magnetic Stimulation: A Systematic Review of the Literature. *J Clin Neurophysiol* 28: 67–74, 2011.
- Pezzulo G, Cisek P.** Navigating the Affordance Landscape: Feedback Control as a Process Model of Behavior and Cognition. *Trends Cogn Sci* 20: 414–424, 2016.
- Quoilin C, Lambert J, Jacob B, Klein P-A, Duque J.** Comparison of Motor Inhibition in Variants of the Instructed-Delay Choice Reaction Time Task. *PLoS One* 11: e0161964, 2016.
- Quoilin C, Wilhelm E, Maurage P, de Timary P, Duque J.** Deficient inhibition in alcohol-dependence: let's consider the role of the motor system! *Neuropsychopharm*, 2018.
- Rastogi A, Cash R, Dunlop K, Vesia M, Kucyi A, Ghahremani A, Downar J, Chen J, Chen R.** Modulation of cognitive cerebello-cerebral functional connectivity by lateral cerebellar continuous theta burst stimulation. *Neuroimage* 158: 48–57, 2017.
- Ratcliff R.** A theory of memory retrieval. *Psych rev* 85:59, 1978.
- Reppert TR, Servant M, Heitz RP, Schall JD.** Neural mechanisms of speed-accuracy tradeoff of visual search: saccade vigor, the origin of targeting errors, and comparison of the superior colliculus and frontal eye field. *J Neurophysiol* 120: 372–384, 2018.
- Rocchi L, Ibáñez J, Benussi A, Hannah R, Rawji V, Casula E, Rothwell J.** Variability and Predictors of Response to Continuous Theta Burst Stimulation: A TMS-EEG Study. *Front Neurosci* 12: 400, 2018.
- Rossini PM, Barker AT, Berardelli A, Caramia MD, Caruso G, Cracco RQ, Dimitrijević MR, Hallett M, Katayama Y, Lücking CH, Maertens de Noordhout AL, Marsden CD, Murray NMF, Rothwell JC, Swash M, Tomberg C.** Non-invasive electrical and magnetic stimulation of the brain, spinal cord and roots: basic principles and procedures for routine clinical application. Report of an IFCN committee. *Electroencephalogr Clin Neurophysiol* 91: 79–92, 1994.
- Rossini PM, Burke D, Chen R, Cohen LG, Daskalakis Z, Di Iorio R, Di Lazzaro V, Ferreri F, Fitzgerald PB, George MS, Hallett M, Lefaucheur JP, Langguth B, Matsumoto H, Miniussi C, Nitsche MA, Pascual-Leone A, Paulus W, Rossi S, Rothwell JC, Siebner HR, Ugawa Y, Walsh V, Ziemann U.** Non-invasive electrical and magnetic stimulation of the brain, spinal cord, roots and peripheral nerves: Basic principles and procedures for routine clinical and research application. An updated report from an I.F.C.N. Committee. *Clin Neurophysiol* 126: 1071–1107, 2015.
- Rothwell JC, Thompson PD, Day BL, Boyd S, Marsden CD.** Stimulation of the human motor cortex through the scalp. [Online]. *Exp Physiol* 76: 159–200, 1991. <http://www.ncbi.nlm.nih.gov/pubmed/2059424> [12 Mar. 2019].
- Sasaki T, Kodama S, Togashi N, Shirota Y, Sugiyama Y, Tokushige S, Inomata-Terada S, Terao Y, Ugawa Y, Hamada M.** The intensity of continuous theta burst stimulation, but not the waveform used to elicit motor evoked potentials, influences its outcome in the human motor cortex. *Brain Stimul* 11: 400–410, 2018.
- Schmidt C, Peigneux P, Muto V, Schenkel M, Knoblauch V, Münch M, de Quervain DJ-F, Wirz-Justice A, Cajochen C.** Encoding Difficulty Promotes Postlearning Changes in Sleep Spindle Activity during Napping. *J Neurosci* 26: 8976–8982, 2006.

- Seideman JA, Stanford TR, Salinas E.** Saccade metrics reflect decision-making dynamics during urgent choices. *Nat Commun* 9: 2907, 2018.
- Solopchuk O, Alamia A, Dricot L, Duque J, Zénon A.** cTBS disruption of the supplementary motor area perturbs cortical sequence representation but not behavioural performance. *Neuroimage* 163: 34–40, 2017.
- Spieser L, Servant M, Hasbroucq T, Burle B.** Beyond decision! Motor contribution to speed–accuracy trade-off in decision-making. *Psychon Bull Rev* 24: 950–956, 2017.
- Steinemann NA, O'Connell RG, Kelly SP.** Decisions are expedited through multiple neural adjustments spanning the sensorimotor hierarchy. *Nat. Commun* 9(1):3627, 2018.
- Stone M.** Models for choice-reaction time. *Psychometrika* 25:251-260, 1960.
- Summerside EM, Shadmehr R, Ahmed AA.** Vigor of reaching movements: reward discounts the cost of effort. *J Neurophysiol* 119: 2347–2357, 2018.
- Svoboda K, Li N.** Neural mechanisms of movement planning: motor cortex and beyond. *Curr Opin Neurobiol* 49: 33–41, 2018.
- Thura D, Beauregard-Racine J, Fradet C-W, Cisek P.** Decision making by urgency gating: theory and experimental support. *J Neurophysiol* 108: 2912–2930, 2012.
- Thura D, Cisek P.** Deliberation and Commitment in the Premotor and Primary Motor Cortex during Dynamic Decision Making. *Neuron* 81: 1401–1416, 2014a.
- Thura D, Cisek P.** Micro-stimulation of premotor and motor cortex delays the commitment to an action choice. Program No. 651.04. 2014 Neuroscience Meeting Planner. Washington, DC: Society for Neuroscience, 2014b.
- Thura D, Cisek P.** Modulation of premotor and primary motor cortical activity during volitional adjustments of speed-accuracy trade-offs. *J Neurosci* 36: 938-956. 2016
- Thura D, Cisek P.** The Basal Ganglia Do Not Select Reach Targets but Control the Urgency of Commitment. *Neuron* 95: 1160–1170.e5, 2017.
- Thura D, Cos I, Trung J, Cisek P.** Context-dependent urgency influences speed-accuracy trade-offs in decision-making and movement execution. *J Neurosci* 34: 16442–54, 2014.
- Torta D, Legrain V, Algoet M, Olivier E, Duque J, Mouraux A.** Theta Burst Stimulation Applied over Primary Motor and Somatosensory Cortices Produces Analgesia Unrelated to the Changes in Nociceptive Event-Related Potentials. *PloS One* 8: e73263, 2013.
- Tosoni A, Corbetta M, Calluso C, Committeri G, Pezzulo G, Romani GL, Galati G.** Decision and action planning signals in human posterior parietal cortex during delayed perceptual choices. *Eur J Neurosci* 39: 1370–1383, 2014.
- Tosun T, Berkay D, Sack AT, Çakmak YÖ, Balci F.** Inhibition of Pre-Supplementary Motor Area by Continuous Theta Burst Stimulation Leads to More Cautious Decision-making and More Efficient Sensory Evidence Integration. *J Cogn Neurosci* 29: 1433–1444, 2017.
- van Maanen L, Fontanesi L, Hawkins GE, Forstmann BU.** Striatal activation reflects urgency in perceptual decision making. *Neuroimage* 139: 294–303, 2016.
- Vandermeeren Y, Davare M, Duque J, Olivier E.** Reorganization of cortical hand representation in congenital hemiplegia. *Eur J Neurosci* 29: 845–854, 2009.

**Vassiliadis P, Grandjean J, Derosiere G, de Wilde Y, Quemener L, Duque J.** Using a Double-Coil TMS Protocol to Assess Preparatory Inhibition Bilaterally. *Front Neurosci* 12: 139, 2018.

**Waldert S, Vigneswaran G, Philipp R, Lemon RN, Kraskov A.** Modulation of the Intracortical LFP during Action Execution and Observation. *J Neurosci* 35: 8451–61, 2015.

**Wyart V, de Gardelle V, Scholl J, Summerfield C.** Rhythmic Fluctuations in Evidence Accumulation during Decision Making in the Human Brain. *Neuron* 76: 847–858, 2012.

**Yoon T, Geary RB, Ahmed AA, Shadmehr R.** Control of movement vigor and decision making during foraging. *Proc Natl Acad Sci U S A* 115: E10476–E10485, 2018.

**Zénon A, Klein P-A, Alamia A, Boursoit F, Wilhelm E, Duque J.** Increased Reliance on Value-based Decision Processes Following Motor Cortex Disruption. *Brain Stimul* 8: 957–964, 2015.

## GRANTS

This work was supported by grants from the “Fonds Spéciaux de Recherche” (FSR) of the Université Catholique de Louvain, the Belgian National Funds for Scientific Research (FRS-FNRS: MIS F.4512.14) and the “Fondation Médicale Reine Elisabeth” (FMRE). GD was a postdoctoral fellow supported by the FNRS.

## AUTHOR CONTRIBUTIONS

G.D., D.T., P.C. and J.D. conceived and designed research; G.D. performed experiments; G.D. analyzed data; G.D., D.T., P.C. and J.D. interpreted results of experiments; G.D. prepared figures; G.D. and J.D. drafted manuscript; G.D., D.T., P.C. and J.D. edited and revised manuscript; G.D., D.T., P.C. and J.D. approved final version of manuscript.

## DISCLOSURES

No conflicts of interest, financial or otherwise, are declared by the authors.
